# Supplementary material for: Synthesis of hierarchical ZSM-5 zeolite using CTAB interacting with carboxyl-ended organosilane as a mesotemplate
Source: Royal Society of Chemistry journal article supplement (doi:10.1039/c3ra46646a), 2014-01-01
Supplement: c3ra46646a1.pdf [file c3ra46646a1.pdf]

# **Synthesis of Hierarchical ZSM-5 Zeolite Using CTAB Interacting with Carboxyl-ended Organosilane as Mesotemplate**

Yicheng Zhang<sup>a</sup>, Kake Zhu<sup>a</sup>, Xuezhi Duan<sup>a</sup>, Ping Li<sup>a</sup>, Xinggui Zhou<sup>\*a</sup>, Weikang Yuan<sup>a</sup>

<sup>a</sup> State Key Laboratory of Chemical Engineering, East China University of Science and Technology, Shanghai, 200237, P. R. China.

E-mail: [xgzhou@ecust.edu.cn](mailto:xgzhou@ecust.edu.cn)

Supporting information:

## Synthesis of IDAA silane (ester form).

Ester form of the iminodiacetic acid (IDAA) terminated organosilane was synthesized by reaction of 3-aminopropyltriethoxysilane (APTES) and ethyl bromoacetate according to the previous literature.<sup>1</sup> The product was identified as IDAA silane (ester form) by <sup>1</sup>H NMR in a CDCl<sub>3</sub> solution with the main peaks of 4.15 (q, 4H, *J* = 7.2 Hz), 3.81 (q, 6H, *J* = 7.2 Hz), 3.55 (s, 4H), 2.71 (pt, 2H, *J* = 7.5 Hz), 1.59 (quintet, 2H, *J* = 8.1 Hz), 1.27 (t, 6H, *J* = 7.2 Hz), 1.22 (t, 9H, *J* = 7.0 Hz), and 0.61 (m, 2H).

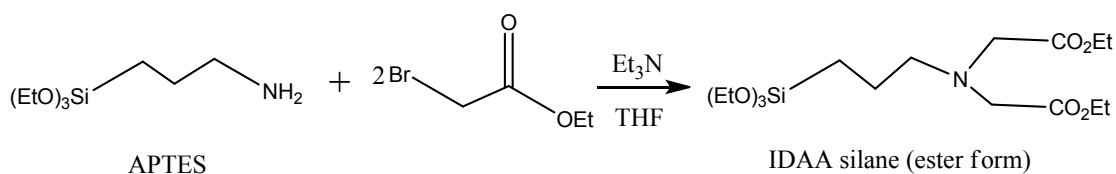

## Synthesis of ZSM-5 zeolites.

The synthesis of ZSM-5 zeolite samples was adapted from the procedure published elsewhere.<sup>2</sup> 0.31 g aluminium isopropoxide (AIP; Shanghai Lingfeng Chemical Co., China) was dissolved in 7.42 g tetrapropylammonium hydroxide (TPAOH, 25 wt % aqueous solution; Shanghai Cainorise Chemicals Co., China), followed by the addition of 14.96 g deionized water and 9.50 g Tetraethyl orthosilicate (TEOS, Shanghai Lingfeng Chemical Co., China). After stirring at 30 °C for 5 h, a clear solution with the following molar composition was obtained: AIP: TEOS: TPAOH: H<sub>2</sub>O = 1: 30: 6: 750. This solution was precrystallized under reflux with vigorous stirring 90 °C for 24 h. Then 0.90 g IDAA silane (ester form) was added into the clear

solution and further refluxed at 90 °C for 6 h, which is similar to literature.<sup>2</sup> Thirdly, the above solution was mixed with surfactant solution which contains 0.83 g CTAB in 28.73 g deionized water and kept stirring at 30 °C for 3 h. The final mixture was crystallized in a Teflon-lined stainless steel autoclave at 170 °C for 72 h. The solid products were separated by centrifugation, washed several times, dried overnight at 110 °C and air calcined at 550 °C for 6 h. Hierarchical zeolite was prepared, and the final composition recipe was AIP: TEOS: TPAOH: CTAB: IDAA silane: H<sub>2</sub>O = 1: 30: 6: 1.5: 1.5: 1800. The obtained ZSM-5 is denoted as ZSM-5 (NCOO<sup>-</sup>-CTAB), which is short for ZSM-5 (N(CH<sub>2</sub>COO<sup>-</sup>)<sub>2</sub>-CTAB).

For comparison, we synthesized another two ZSM-5 zeolites, one was added with CTAB without any organosilane, and the other one was added with APTES (5 mol % with respect to the silica content in the gel) instead of IDAA silane (ester form). They are denoted as ZSM-5 (CTAB) and ZSM-5 (NH<sub>2</sub>-CTAB), respectively.

### **Preparation of samples for FT-IR measurement.**

The samples for FT-IR measurement were prepared as the following procedures which are schematically shown in Scheme S1:

ZSM-5precursor (NCOO<sup>-</sup>): The precursor solution was obtained after the precrystallization and silanization step. The solid phase was formed by drying the precursor solution under vacuum at 50 °C. So the obtained solid contains the –COO<sup>-</sup> group both anchored on the zeolite and existing in the solvent.

ZSM-5precursor (NCOOH): The precursor solution was acidified by adding

concentrated hydrochloric acid (HCl) until pH = 1. The solid phase was formed by drying the acidified precursor solution under vacuum at 50 °C. So the obtained solid contains the –COOH group both anchored on the zeolite seeds and existing in the solvent.

ZSM-5seed (NCOOH-CTAB): CTAB was mixed with precursor solution for 3 h after the silanization step, disturbing the colloidal stability of precursor solution. The resultant suspension was acidified by adding concentrated hydrochloric acid (HCl) until pH=1. The zeolite seeds in the acidified suspension were collected by centrifugation, followed by repeated washing with 0.1 mol/L HCl solution to preserve the protonated carboxylic acid group. Then the solid phase was further dried under vacuum at 80 °C. So the obtained solid contains the –COOH group only anchored on the zeolite seeds.

ZSM-5(NCOOH-CTAB) + Supernatant: The product after high temperature crystallization was directly stirred at room temperature without separating supernatant, and then was acidified by adding concentrated hydrochloric acid (HCl) until pH=1. Then the acidified suspension was stirred under 80 °C to evaporate the solvent, followed by further drying under vacuum at 80 °C. So the obtained solid contains the –COOH group both anchored on the zeolite and existing in the supernatant.

ZSM-5 (NCOOH-CTAB): The zeolite after high temperature crystallization was

stirred at room temperature without separating supernatant, and was acidified by adding concentrated hydrochloric acid (HCl) until pH=1. The acidified zeolite was collected by centrifugation, followed by repeated washing with 0.1 mol/L HCl solution. Then the solid was further dried under vacuum at 80 °C. So the obtained solid contains the –COOH group only anchored on the zeolite.

## **Characterization**

X-ray diffraction (XRD) patterns were recorded with a Rigaku D/Max2550V diffractometer, with CuK $\alpha$  Radiation at 40 kV and 100 mA. The XRD patterns were collected in the range of 5–50° in  $2\theta / \theta$  scanning mode with a 0.02° step and scanning speed of 12 degree/min. Nitrogen adsorption–desorption isotherms were measured at 77 K on an ASAP 2010 (Micromeritics, USA) analyzer. Specific surface area was calculated by the BET (Brunauer-Emmett-Teller) method based on the adsorption data at  $P/P_0$  of 0.05-0.25. The poresize distribution was calculated from the adsorption branch using the BJH (Barrett-Joyner-Halenda) method, and total pore volume was obtained from the adsorption at  $P/P_0 = 0.995$ . Scanning electron microscopy (SEM) images were recorded on a Hitachi S-3400N Electron Microscope at an acceleration voltage of 15 kV. Transmission electron microscopy (TEM) images were obtained on a JEM-2100 instrument operated at 200 kV. All samples subjected to TEM measurements were dispersed in ethanol ultrasonically and were dropped on copper grids. Solid state  $^{29}\text{Si}$  MAS NMR spectra were recorded with an AVANCE 500 NMR spectrometer at a spinning frequency of 99.36 MHz.  $^{29}\text{Si}$  chemical shifts were obtained with reference to tetramethylsilane (TMS) as an external standard ( $\delta_{\text{TMS}}$

= 0 ppm). The Fourier transform infrared spectra (Nicolet 6700 FTIR) of the sample were recorded in the range of 400~4000  $\text{cm}^{-1}$  with a resolution of 2  $\text{cm}^{-1}$ . The solid samples were pressed into KBr pellets; the liquid sample (ester form of the IDAA silane) was analyzed by casting a film on KRS-5 plate. Thermogravimetric (TGA) analyses were performed using a Perkin-Elmer Pyris 1 TGA instrument at a heating rate of 10  $^{\circ}\text{C min}^{-1}$  in air.

Table S1 Textural properties obtained by nitrogen physisorption experiments.

| Sample                       | $S_{\text{BET}}$<br>( $\text{m}^2\text{g}^{-1}$ ) <sup>a</sup> | $V_{\text{micro}}$<br>( $\text{cm}^3\text{g}^{-1}$ ) <sup>b</sup> | $V_{\text{total}}$<br>( $\text{cm}^3\text{g}^{-1}$ ) <sup>c</sup> | $V_{\text{meso}}$<br>( $\text{cm}^3\text{g}^{-1}$ ) <sup>d</sup> |
|------------------------------|----------------------------------------------------------------|-------------------------------------------------------------------|-------------------------------------------------------------------|------------------------------------------------------------------|
| ZSM-5(NCOO-CTAB)             | 441                                                            | 0.11                                                              | 0.36                                                              | 0.25                                                             |
| ZSM-5(CTAB)                  | 475                                                            | 0.09                                                              | 0.43                                                              | 0.34                                                             |
| ZSM-5(NH <sub>2</sub> -CTAB) | 339                                                            | 0.11                                                              | 0.25                                                              | 0.14                                                             |

<sup>a</sup> Surface areas were obtained by the BET method using adsorption data in  $P/P_0$  range from 0.05 to 0.25.

<sup>b</sup> Measured by t-plot method.

<sup>c</sup> Total pore volumes were estimated from the adsorbed amount at  $P/P_0=0.995$ .

<sup>d</sup>  $V_{\text{meso}}=V_{\text{ads, } P/P_0=0.99} - V_{\text{micro}}$ .

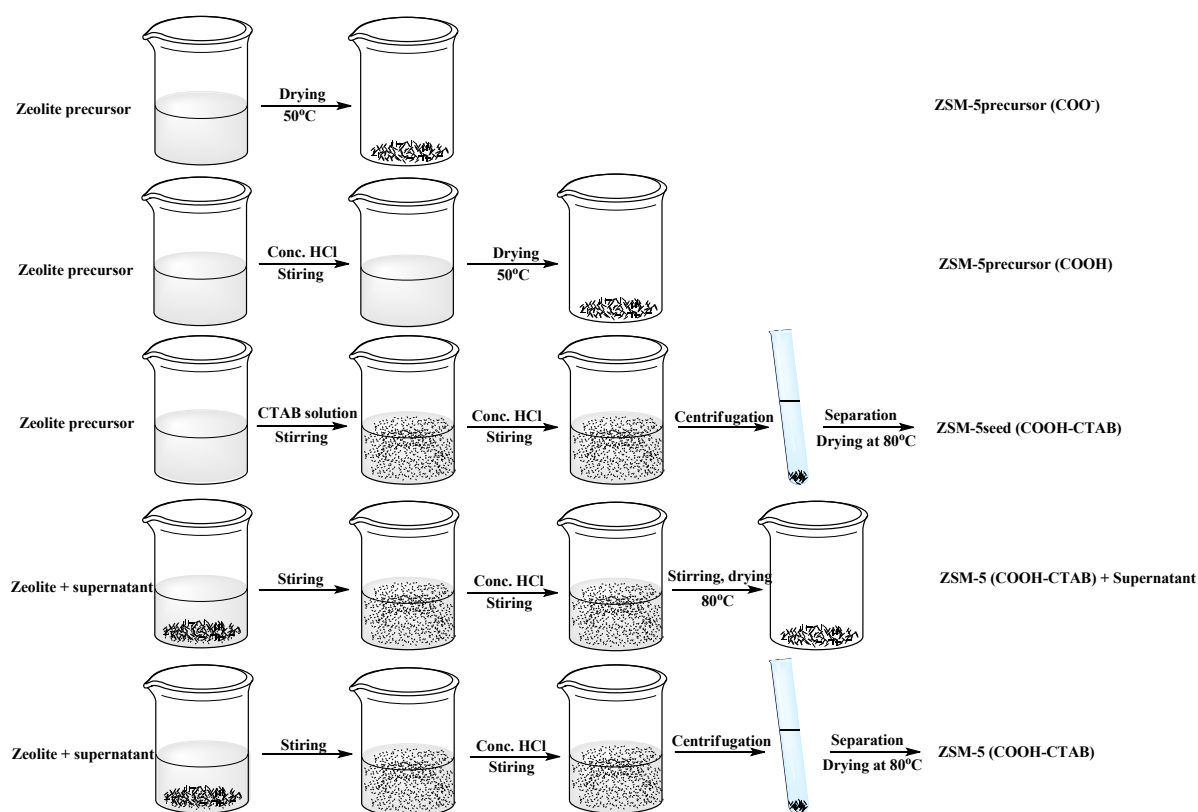

Scheme S1. Schematic diagram of the sample preparation procedures for FT-IR measurement.

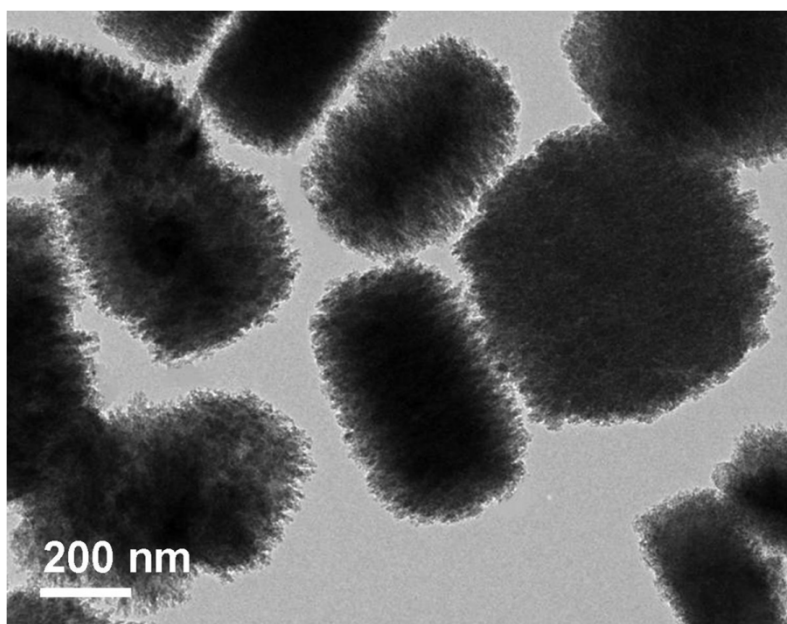

Figure S1. TEM image of ZSM-5 (NCOO-CTAB).



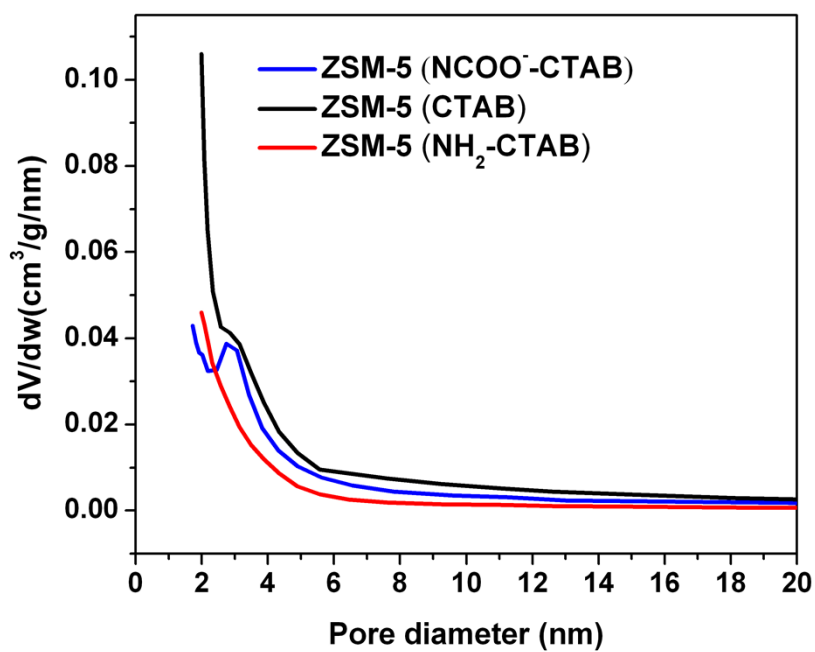

Figure S2 BJH pore size distributions of ZSM-5 (NCOO<sup>-</sup>-CTAB), ZSM-5 (CTAB) and ZSM-5 (NH<sub>2</sub>-CTAB).

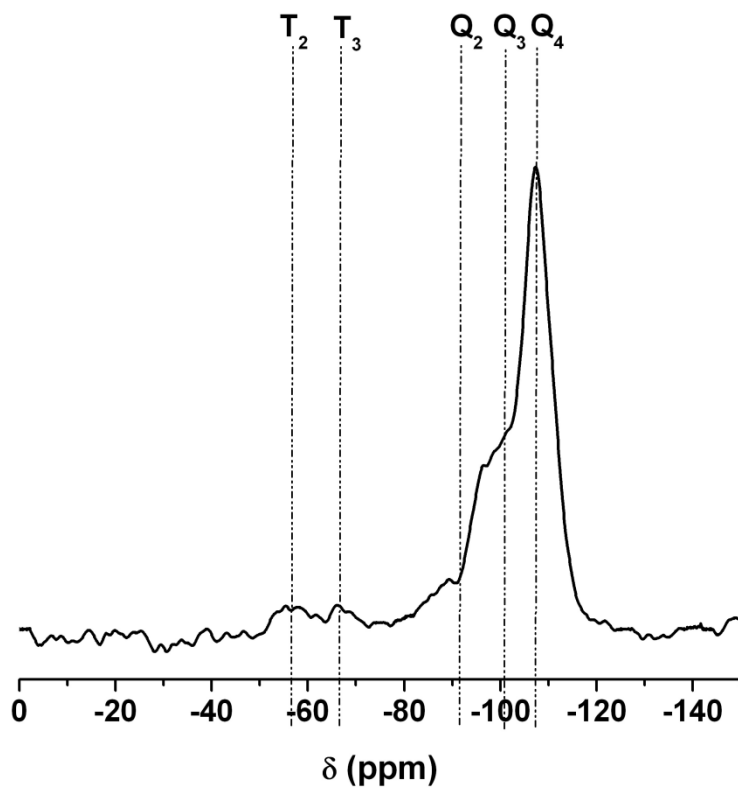

Figure S3  $^{29}\text{Si}$  MAS NMR spectrum of as-synthesized ZSM-5 (NCOO-CTAB).

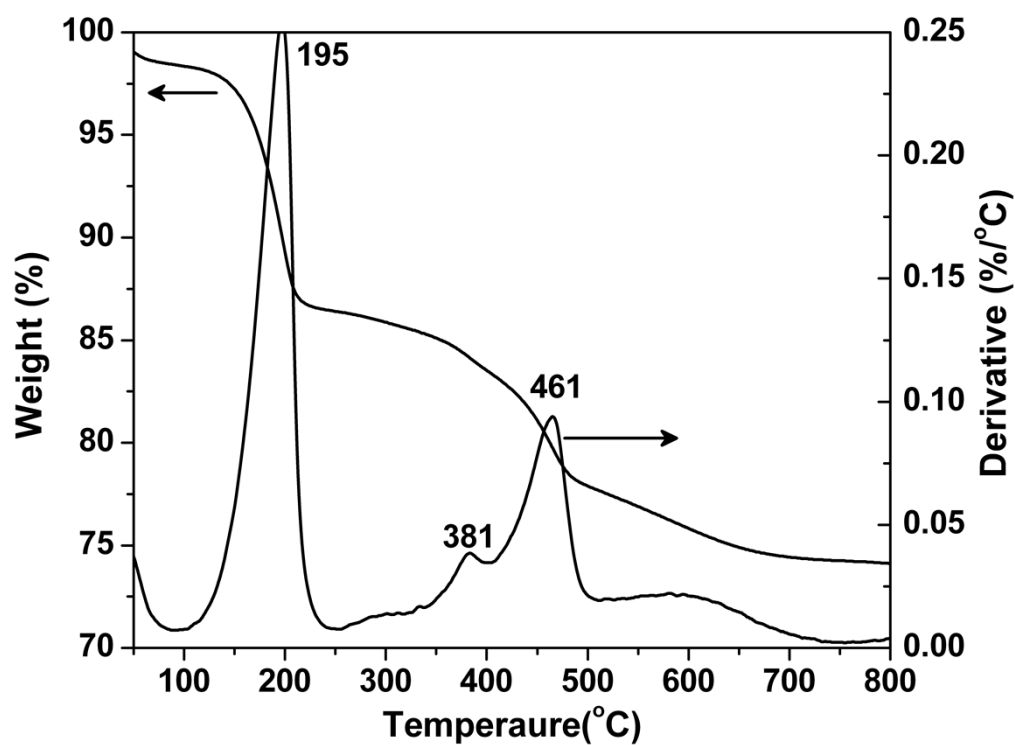

Figure S4 TG and DTG of as-synthesized ZSM-5 (NCOO-CTAB). The weight losses within 130-340 °C and 340-410 °C are due to the decomposition of CTAB and organic moiety of IDAA silane, which are estimated to be 12.7% and 1.8%, respectively. The weight loss within 410-510 °C is due to the  $\text{TPA}^+$  strongly retained in the zeolite micropores, and that within 510-800 °C is due to the complete combustion of all the remaining organics.

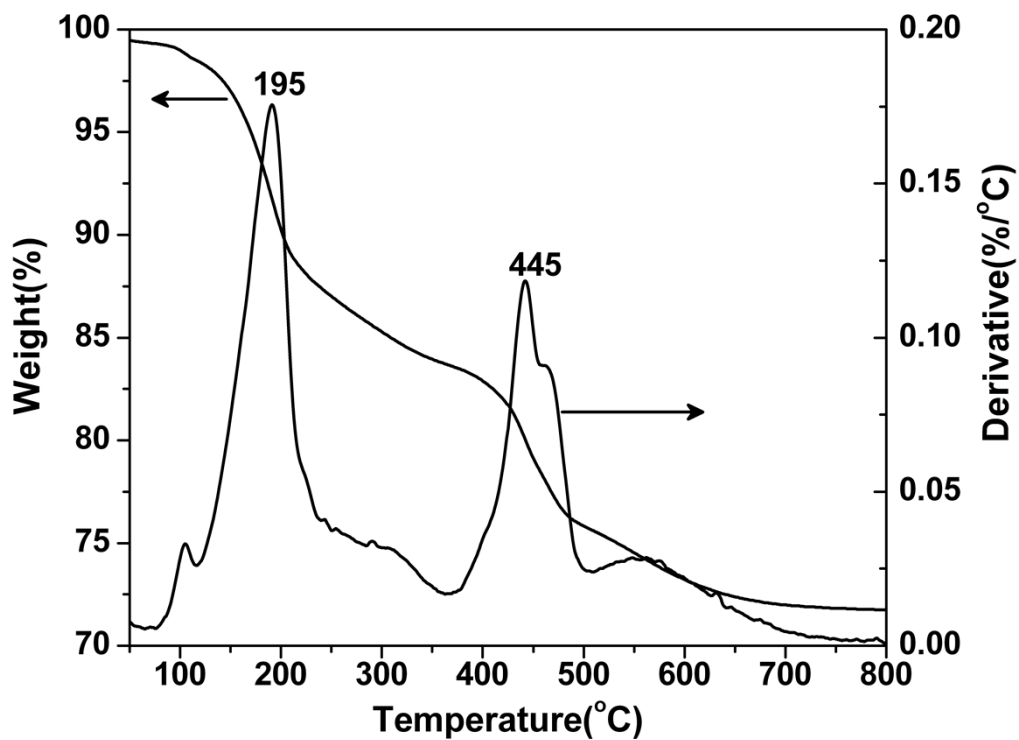

Figure S5 TG and DTG of as-synthesized ZSM-5 (CTAB). The weight loss within 120-340 °C is due to the decomposition of CTAB, which is estimated to be 14.2%. The weight loss within 420-510 °C is due to the TPA<sup>+</sup> strongly retained in the zeolite micropores, and that within 510-800 °C is due to the complete combustion of all the remaining organics.

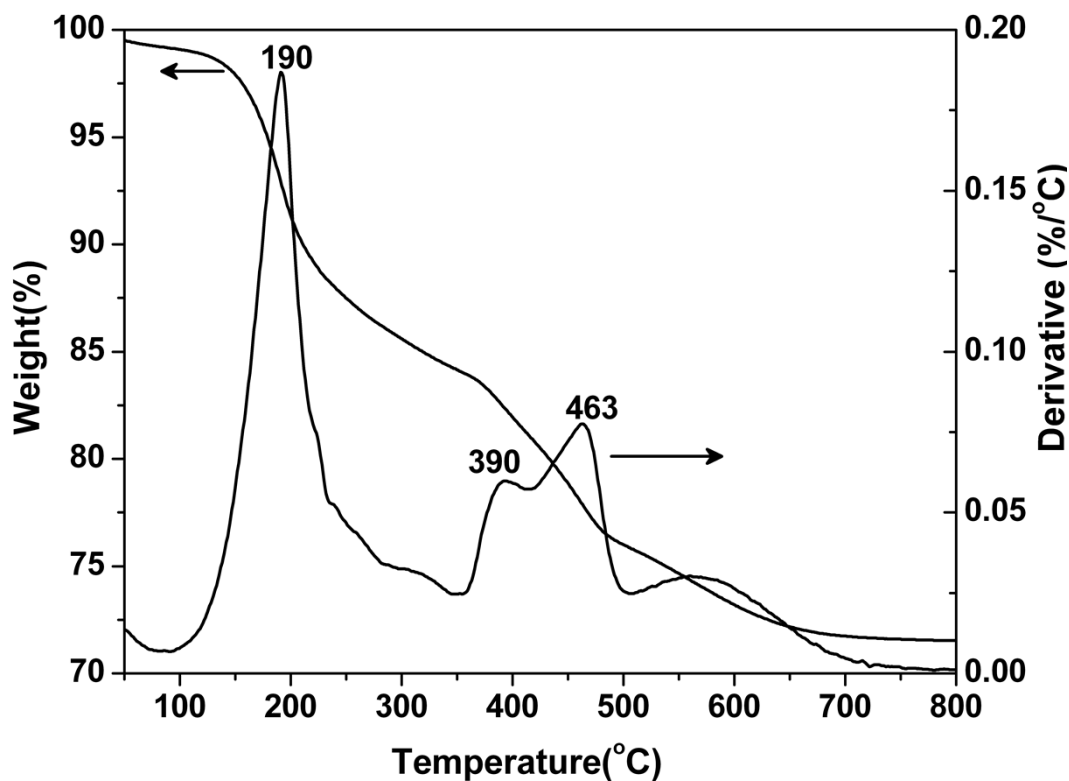

Figure S6 TG and DTG of as-synthesized ZSM-5 (NH<sub>2</sub>-CTAB). The weight losses within 130-350 °C and 350-420 °C are due to the decomposition of CTAB and organic moiety of APTES, which are estimated to be 14.9% and 2.6%, respectively. The weight loss within 420-510 °C is due to the TPA<sup>+</sup> strongly retained in the zeolite micropores, and that within 510-800 °C is due to the complete combustion of all the remaining organics.

## References

- (1) B. Busche, R. Wiacek, J. Davidson, V. Koonsiripaiboon, W. Yantasee, R. S. Addleman and G. E. Fryxell, *Inorg. Chem. Commun.*, 2009. **12**, 312.
- (2) D. P. Serrano, J. Aguado, J. M. Escola, J. M. Rodríguez and Á. Peral, *Chem.*

*Mater.*, 2006. **18**, 2462.
